# Supplementary material
Source: publisher figshare collection journal article supplement (https://karger.figshare.com/ndownloader/files/27948798)
Supplement: Supplementary file 1 [file 27948798]

**Supplementary Table S4.** Number of chromosomes and ManDra-A 5 repeat FISH signals detected in the somatic cells of dojo loach.

| Group | Number of signals |  | | | Number of chromosomes | | | | | | Total |
| --- | --- | --- | --- | --- | --- | --- | --- | --- | --- | --- | --- |
| ManDra-A 5 repeat |  | 44 | 45 | | 46 | 47 | 48 | 49 | 50 |
| Group A | 26 |  |  |  | |  |  |  |  | 15 | 15 |
|  | 25 |  |  |  | |  |  |  |  | 2 | 2 |
|  | 24 |  |  |  | |  | 1 | 1 |  |  | 2 |
|  |  | Total |  |  | |  | 1 | 1 |  | 17 | 19 |
|  |  |  |  |  | |  |  |  |  |  |  |
| Group B | 0 |  | 3 |  | | 1 | 3 | 2 | 3 | 42 | 54 |
|  |  | Total | 3 |  | | 1 | 3 | 2 | 3 | 42 | 54 |
|  |  |  |  |  | |  |  |  |  |  |  |
